# Supplementary material for: A polymer-based neural microimplant for optogenetic applications: design and first in vivo study
Source: Royal Society of Chemistry journal article supplement (doi:10.1039/c2lc40874k), 2013-01-01
Supplement: c2lc40874k.pdf [file c2lc40874k.pdf]

A polymer-based microimplant for optogenetic applications: design and first in vivo study

## A polymer-based neural microimplant for optogenetic applications: design and first in vivo study

Birthe Rubehn<sup>1</sup>, Steffen B.E. Wolff<sup>2</sup>, Philip Tovote<sup>2</sup>, Andreas Lüthi<sup>2</sup> and Thomas Stieglitz<sup>1\*</sup>

<sup>1</sup> Laboratory for Biomedical Microtechnology, Department of Microsystems Engineering—IMTEK and the Bernstein Center Freiburg, University of Freiburg, Freiburg, Germany

<sup>2</sup> Friedrich Miescher Institute for Biomedical Research, Basel, Switzerland

\*corresponding author: Georges-Koehler-Allee 102, 79110 Freiburg, Germany, phone: +497612037471, fax: +497612037472, email: [stieglitz@imtek.uni-freiburg.de](mailto:stieglitz@imtek.uni-freiburg.de),

### Electronic Supplementary Information

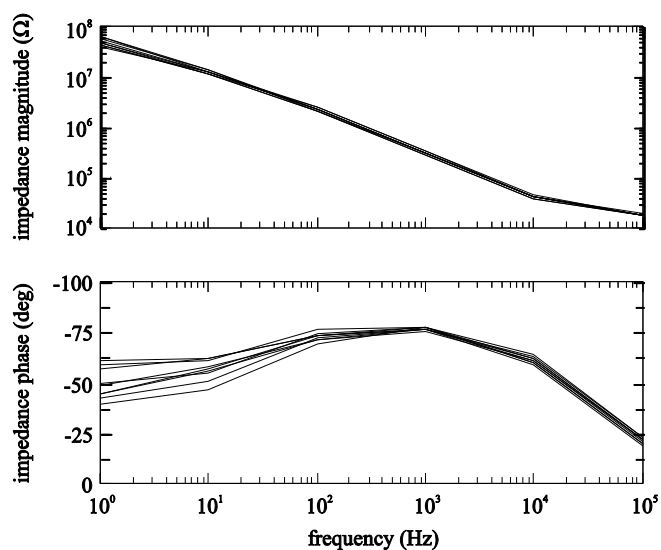

**S1: Electrochemical impedance spectra of nine electrode sites (30 μm in diameter, platinum) of one implant device. Bode plot displays impedance magnitude and phase of the complex electrode impedance.**

## A polymer-based microimplant for optogenetic applications: design and first in vivo study

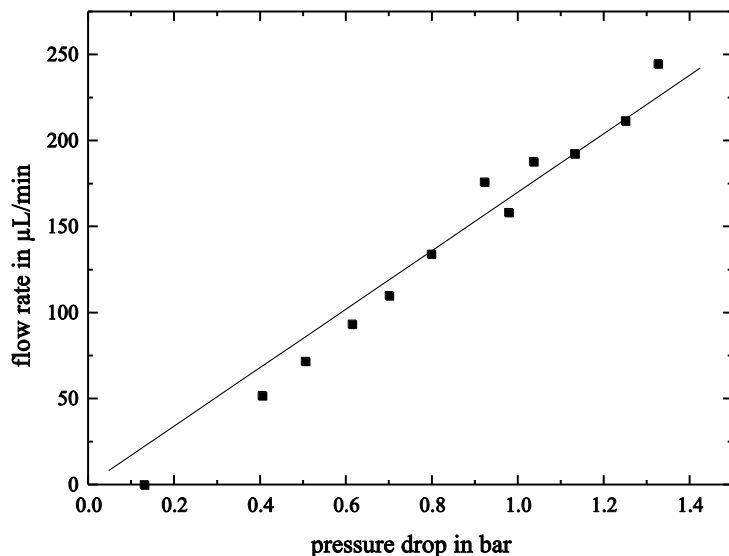

**S2:** The flow rate as a function of fluid pressure in the microfluidic channels. The squares show the measured values, the straight line represents the theoretical values calculated with the Hagen-Poiseuille equation for rectangular cross-sections with a width of 50  $\mu\text{m}$ , a height of 45  $\mu\text{m}$  and a length of 7 mm.

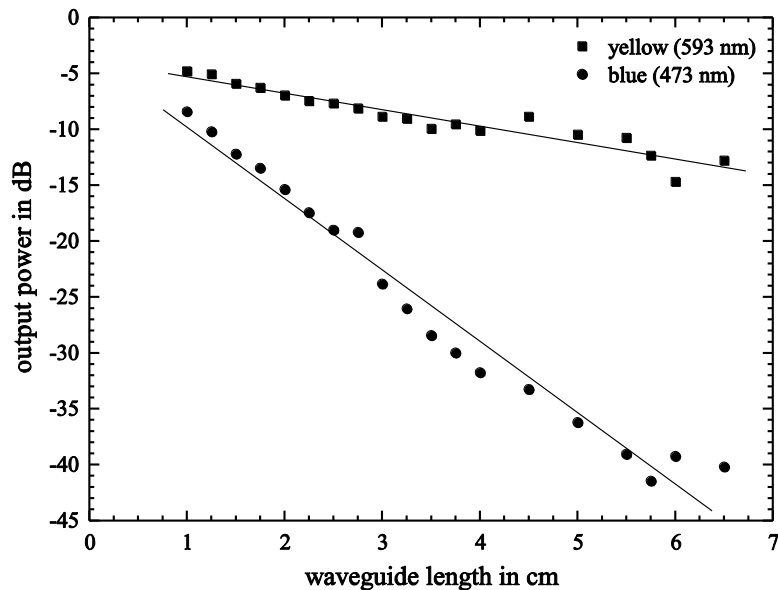

**S3:** The waveguide's output power as a function of waveguide length measured with yellow light (squares) and blue light (circles). The input power was 21 mW (blue) and 14 mW (yellow), respectively. By using a linear fit (straight lines), the transmission loss could be obtained as the slope of the linear fit with -6.4 dB/cm (473 nm) and -1.5 dB/cm (593 nm). The coupling loss between the optical fibre and the waveguide was estimated by the ordinate intercept of the linear fit which was -3.4 dB (473 nm) and -3.8 dB (593 nm).
